# Supplementary material for: Anharmonic IR spectra of solvated ammonium and aminium ions: resemblance between water and bisulfate solvations
Source: Royal Society of Chemistry journal article supplement (doi:10.1039/d2cp00663d), 2022-01-01
Supplement: d2cp00663d1.pdf [file d2cp00663d1.pdf]

# Anharmonic IR spectra of solvated ammonium and aminium ions: Resemblance between water and bisulfate solvations

Chih-Kai Lin,<sup>a,\*</sup> and Jer-Lai Kuo<sup>b,c,d,\*</sup>

<sup>a</sup> Department of Chemistry, National Taiwan University, Taipei, 10617, ROC.

<sup>b</sup> Institute of Atomic and Molecular Sciences, Academia Sinica, Taipei 10617, Taiwan, ROC.

<sup>c</sup> Department of Chemistry, National Tsing Hua University, Hsinchu 30013, Taiwan, ROC.

<sup>d</sup> International Graduate Program of Molecular Science and Technology, National Taiwan University, Taipei, 10617, Taiwan, ROC.

e-mail: ethenel@gmail.com (CKL), jlkuo@pub.iams.sinica.edu.tw (JLK)

## Electronic Supplementary Information

This supporting information gives the Cartesian coordinates of optimized geometries, calculated anharmonic bands and assignments, and anharmonic coupling constants of clusters composed of ammonium/aminium solvated by either water or bisulfate investigated in this work.

**Table S1.** Cartesian coordinates of clusters optimized at the MP2/aug-cc-pVDZ level.

NH<sub>4</sub><sup>+</sup>...(H<sub>2</sub>O)<sub>2</sub>

|   |             |             |             |
|---|-------------|-------------|-------------|
| N | -0.00881807 | 1.06215806  | 0.00000000  |
| H | 0.85639895  | 0.47373110  | 0.00000000  |
| H | -0.01253205 | 1.66035810  | -0.82974909 |
| H | -0.86479005 | 0.45966203  | 0.00000000  |
| H | -0.01253205 | 1.66035810  | 0.82974909  |
| O | 2.26732499  | -0.51414085 | 0.00000000  |
| H | 2.78865896  | -0.79026787 | 0.76684094  |
| H | 2.78865896  | -0.79026787 | -0.76684094 |
| O | -2.26617001 | -0.52995902 | 0.00000000  |
| H | -2.29383398 | -1.49696402 | 0.00000000  |
| H | -3.19294502 | -0.25226905 | 0.00000000  |

CH<sub>3</sub>NH<sub>3</sub><sup>+</sup>...(H<sub>2</sub>O)<sub>2</sub>

|   |             |             |             |
|---|-------------|-------------|-------------|
| N | 0.00402013  | 0.47654098  | 0.53036787  |
| H | -0.85128185 | -0.08020408 | 0.32305395  |
| H | -0.00713383 | 0.70119305  | 1.52913785  |
| H | 0.84435615  | -0.10961198 | 0.34176486  |
| C | 0.03670001  | 1.72270593  | -0.30089021 |
| H | 0.05748597  | 1.42749287  | -1.35586820 |

|   |             |             |             |
|---|-------------|-------------|-------------|
| H | -0.85940502 | 2.31631889  | -0.08834220 |
| H | 0.93900399  | 2.29272300  | -0.05359430 |
| O | -2.33436382 | -0.93096120 | -0.09822492 |
| H | -2.95711987 | -0.74894228 | -0.81580390 |
| H | -2.73713275 | -1.65748819 | 0.39785215  |
| O | 2.30535618  | -0.96838092 | -0.12014116 |
| H | 2.35339520  | -1.76733095 | -0.66364012 |
| H | 3.20155219  | -0.85143584 | 0.22513478  |

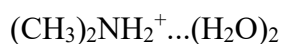

|   |             |             |             |
|---|-------------|-------------|-------------|
| N | 0.00000000  | 0.00000000  | 0.33627906  |
| H | -0.84051974 | 0.01246488  | -0.27348194 |
| H | 0.84051974  | -0.01246488 | -0.27348194 |
| C | -0.02283574 | -1.24551768 | 1.16002006  |
| H | -0.93006131 | -1.24356077 | 1.77655806  |
| H | -0.02523530 | -2.11398862 | 0.49000906  |
| H | 0.86828033  | -1.26235578 | 1.79987706  |
| C | 0.02283574  | 1.24551768  | 1.16002006  |
| H | 0.02523530  | 2.11398862  | 0.49000906  |
| H | -0.86828033 | 1.26235578  | 1.79987706  |
| H | 0.93006131  | 1.24356077  | 1.77655806  |
| O | -2.40667401 | -0.00450640 | -1.12914294 |
| H | -2.64414620 | -0.56324013 | -1.88243794 |
| H | -3.16554531 | 0.58444462  | -1.01447794 |
| O | 2.40667401  | 0.00450640  | -1.12914294 |
| H | 3.16554531  | -0.58444462 | -1.01447794 |
| H | 2.64414620  | 0.56324013  | -1.88243794 |

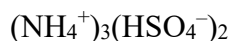

|   |             |             |             |
|---|-------------|-------------|-------------|
| N | -2.37171314 | 0.05214604  | -1.35000896 |
| H | -1.56080336 | -0.59757226 | -1.48398096 |
| H | -2.12242763 | 0.69257217  | -0.56215196 |
| H | -2.52120521 | 0.60273675  | -2.19751396 |
| H | -3.21136238 | -0.48415883 | -1.12528496 |
| N | 2.37171314  | -0.05214604 | -1.35000896 |
| H | 2.12242763  | -0.69257217 | -0.56215196 |
| H | 1.56080336  | 0.59757226  | -1.48398096 |
| H | 3.21136238  | 0.48415883  | -1.12528496 |
| H | 2.52120521  | -0.60273675 | -2.19751396 |
| N | 0.00000000  | 0.00000000  | 2.72506904  |
| H | -0.52453758 | -0.66045210 | 2.10217904  |
| H | 0.52453758  | 0.66045210  | 2.10217904  |

|   |             |             |             |
|---|-------------|-------------|-------------|
| H | 0.65190571  | -0.52551348 | 3.30960304  |
| H | -0.65190571 | 0.52551348  | 3.30960304  |
| S | -0.01112731 | -2.06202598 | -0.00299296 |
| O | -0.14016566 | -1.58344469 | -1.42339896 |
| O | 1.30889341  | -1.69148970 | 0.63839204  |
| O | -1.18499227 | -1.68266302 | 0.87470404  |
| O | -0.03890578 | -3.69040079 | -0.18716396 |
| H | 0.04079284  | -4.09541476 | 0.69709304  |
| S | 0.01112731  | 2.06202598  | -0.00299296 |
| O | -1.30889341 | 1.69148970  | 0.63839204  |
| O | 0.14016566  | 1.58344469  | -1.42339896 |
| O | 1.18499227  | 1.68266302  | 0.87470404  |
| O | 0.03890578  | 3.69040079  | -0.18716396 |
| H | -0.04079284 | 4.09541476  | 0.69709304  |

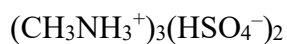

|   |             |             |             |
|---|-------------|-------------|-------------|
| N | -0.09483276 | -2.04724491 | 1.81615047  |
| H | -0.69042495 | -1.19201105 | 1.81201494  |
| H | 0.53849431  | -1.94508916 | 0.99444236  |
| H | -0.71268655 | -2.84421834 | 1.64428576  |
| C | 0.68097714  | -2.18571156 | 3.08277979  |
| H | 1.29526036  | -3.09187751 | 3.02990640  |
| H | -0.01667493 | -2.24912128 | 3.92570582  |
| H | 1.31839893  | -1.29991025 | 3.17594934  |
| N | -0.20527674 | 2.62634735  | 0.80973147  |
| H | -0.82977056 | 2.21518397  | 0.08554211  |
| H | 0.42336541  | 1.84661300  | 1.10437587  |
| H | -0.79518388 | 2.87027858  | 1.60920699  |
| C | 0.57706905  | 3.78767265  | 0.29665557  |
| H | 1.21715287  | 4.16986718  | 1.10010699  |
| H | -0.11444210 | 4.56816592  | -0.04083484 |
| H | 1.19126622  | 3.42835737  | -0.53614075 |
| N | -0.18736262 | -0.57206559 | -2.66729606 |
| H | -0.79616261 | -0.97213145 | -1.92036644 |
| H | 0.48976118  | 0.05045842  | -2.17212805 |
| H | -0.78258270 | 0.01877727  | -3.25277713 |
| C | 0.51340371  | -1.63129976 | -3.44723818 |
| H | 1.14349468  | -1.15942991 | -4.21011092 |
| H | -0.23033009 | -2.28156074 | -3.92214215 |
| H | 1.13034577  | -2.20270141 | -2.74536114 |
| S | -2.18573804 | -0.01152043 | 0.03799577  |

|   |             |             |             |
|---|-------------|-------------|-------------|
| O | -1.69943625 | 0.22883308  | 1.44029241  |
| O | -1.83579420 | 1.10394501  | -0.92353810 |
| O | -1.80363567 | -1.36818429 | -0.51567087 |
| O | -3.81654106 | -0.00415047 | 0.23526858  |
| H | -4.22320893 | -0.16060506 | -0.63760820 |
| S | 1.96006296  | 0.01683544  | -0.01669684 |
| O | 1.59689433  | -1.41647719 | -0.33666743 |
| O | 1.48154771  | 0.46896564  | 1.33487534  |
| O | 1.59013486  | 0.95518043  | -1.14459248 |
| O | 3.59226792  | 0.08792312  | 0.16009221  |
| H | 3.99483308  | -0.17559423 | -0.68861129 |

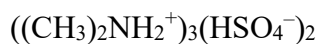

|   |             |             |             |
|---|-------------|-------------|-------------|
| N | 2.39602719  | -0.48490686 | -1.38701208 |
| H | 1.70846062  | 0.29497189  | -1.46508808 |
| H | 1.98741581  | -1.11285526 | -0.66411608 |
| C | 2.48399480  | -1.20976299 | -2.68452708 |
| H | 3.17777630  | -2.05292926 | -2.57287308 |
| H | 2.85569018  | -0.51753719 | -3.45091708 |
| H | 1.48281111  | -1.57332246 | -2.94200908 |
| C | 3.70024296  | 0.05322692  | -0.91174408 |
| H | 3.52880338  | 0.58265087  | 0.03248392  |
| H | 4.09189550  | 0.74673140  | -1.66697308 |
| H | 4.39866903  | -0.78173450 | -0.77127608 |
| N | -2.39602719 | 0.48490686  | -1.38701208 |
| H | -1.98741581 | 1.11285526  | -0.66411608 |
| H | -1.70846062 | -0.29497189 | -1.46508808 |
| C | -3.70024296 | -0.05322692 | -0.91174408 |
| H | -4.09189550 | -0.74673140 | -1.66697308 |
| H | -4.39866903 | 0.78173450  | -0.77127608 |
| H | -3.52880338 | -0.58265087 | 0.03248392  |
| C | -2.48399480 | 1.20976299  | -2.68452708 |
| H | -1.48281111 | 1.57332246  | -2.94200908 |
| H | -3.17777630 | 2.05292926  | -2.57287308 |
| H | -2.85569018 | 0.51753719  | -3.45091708 |
| N | 0.00000000  | 0.00000000  | 2.80507592  |
| H | 0.54123970  | 0.62278647  | 2.16669392  |
| H | -0.54123970 | -0.62278647 | 2.16669392  |
| C | 0.94324669  | -0.81365947 | 3.61908692  |
| H | 0.36516784  | -1.49275581 | 4.25919392  |
| H | 1.54788400  | -0.13997233 | 4.23989992  |

|   |             |             |             |
|---|-------------|-------------|-------------|
| H | 1.57879300  | -1.38735594 | 2.93512692  |
| C | -0.94324669 | 0.81365947  | 3.61908692  |
| H | -1.57879300 | 1.38735594  | 2.93512692  |
| H | -0.36516784 | 1.49275581  | 4.25919392  |
| H | -1.54788400 | 0.13997233  | 4.23989992  |
| S | 0.36912814  | 2.08076492  | -0.00560808 |
| O | 0.48318900  | 1.55269428  | -1.40814208 |
| O | -1.02551198 | 1.97392736  | 0.56965792  |
| O | 1.41436877  | 1.54168105  | 0.94545192  |
| O | 0.69152085  | 3.68087187  | -0.22078408 |
| H | 0.64897208  | 4.10923441  | 0.65453792  |
| S | -0.36912814 | -2.08076492 | -0.00560808 |
| O | 1.02551198  | -1.97392736 | 0.56965792  |
| O | -0.48318900 | -1.55269428 | -1.40814208 |
| O | -1.41436877 | -1.54168105 | 0.94545192  |
| O | -0.69152085 | -3.68087187 | -0.22078408 |
| H | -0.64897208 | -4.10923441 | 0.65453792  |

**Table S2.** Calculated peak positions (in  $\text{cm}^{-1}$ ), IR intensities (in  $\text{km mol}^{-1}$ ), and assignments of absorption peaks of ammonium/aminium ions solvated by water and bisulfate.<sup>a</sup>

| $\text{NH}_4^+ \dots (\text{H}_2\text{O})_2$ |              |                                             | $(\text{NH}_4^+)_3(\text{HSO}_4^-)_2$ |              |                                              |
|----------------------------------------------|--------------|---------------------------------------------|---------------------------------------|--------------|----------------------------------------------|
| wavenumber                                   | IR intensity | assignment                                  | wavenumber                            | IR intensity | assignment                                   |
| 2790                                         | 483          | $\text{FR}_{\text{uu}}/\text{S}_{\text{B}}$ | 2745                                  | 335          | $\text{FR}_{\text{uu}}/\text{S}_{\text{B}}$  |
| 2816                                         | 341          | $\text{FR}_{\text{uu}}/\text{S}_{\text{B}}$ | 2830                                  | 533          | $\text{S}_{\text{B}}/\text{FR}_{\text{uu}}$  |
| 2851                                         | 411          | $\text{S}_{\text{B}}/\text{FR}_{\text{uu}}$ | 2878                                  | 266          | $\text{FR}_{\text{uu}}/\text{S}_{\text{B}}$  |
| 2901                                         | 324          | $\text{FR}_{\text{uu}}/\text{S}_{\text{B}}$ | 2891                                  | 487          | $\text{S}_{\text{B}}/\text{FR}_{\text{uu}}$  |
| 2927                                         | 583          | $\text{S}_{\text{B}}/\text{FR}_{\text{uu}}$ | 3008                                  | 111          | $\text{FR}_{\text{uu}}$                      |
| 3020                                         | 72           | $\text{FR}_{\text{uu}}$                     | 3054                                  | 17           | $\text{FR}_{\text{ux}}$                      |
| 3113                                         | 22           | $\text{FR}_{\text{ux}}$                     | 3188                                  | 11           | $\text{FR}_{\text{ux}}$                      |
| 3212                                         | 27           | $\text{FR}_{\text{ux}}$                     | 3333                                  | 88           | $\text{S}_{\text{FS}}/\text{FR}_{\text{xx}}$ |
| 3327                                         | 109          | $\text{S}_{\text{FS}}$                      | 3350                                  | 41           | $\text{FR}_{\text{xx}}/\text{S}_{\text{FS}}$ |
| 3377                                         | 100          | $\text{S}_{\text{FA}}$                      | 3409                                  | 80           | $\text{S}_{\text{FA}}$                       |

  

| $\text{MA-H}^+ \dots (\text{H}_2\text{O})_2$ |              |                         | $(\text{MA-H}^+)_3(\text{HSO}_4^-)_2$ |              |                         |
|----------------------------------------------|--------------|-------------------------|---------------------------------------|--------------|-------------------------|
| wavenumber                                   | IR intensity | assignment              | wavenumber                            | IR intensity | assignment              |
| 2482                                         | 11           | $\text{FR}_{\text{ru}}$ | 2460                                  | 18           | $\text{FR}_{\text{ru}}$ |
| 2522                                         | 42           | $\text{FR}_{\text{ru}}$ | 2487                                  | 34           | $\text{FR}_{\text{ru}}$ |
| 2573                                         | 8            | $\text{FR}_{\text{rx}}$ | 2575                                  | 9            | $\text{FR}_{\text{rx}}$ |
| 2637                                         | 22           | $\text{FR}_{\text{rx}}$ | 2608                                  | 8            | $\text{FR}_{\text{rx}}$ |
| 2833                                         | 102          | $\text{FR}_{\text{ru}}$ | 2807                                  | 76           | $\text{FR}_{\text{ru}}$ |
| 2846                                         | 51           | $\text{FR}_{\text{ru}}$ | 2824                                  | 29           | $\text{FR}_{\text{ru}}$ |
| 2928                                         | 116          | $\text{FR}_{\text{rx}}$ | 2886                                  | 64           | $\text{FR}_{\text{rx}}$ |
| 2938                                         | 94           | $\text{FR}_{\text{rx}}$ | 2892                                  | 27           | $\text{FR}_{\text{rx}}$ |
| 2953                                         | 62           | $\text{FR}_{\text{rx}}$ | 2917                                  | 47           | $\text{FR}_{\text{rx}}$ |
| 2956                                         | 47           | $\text{FR}_{\text{rx}}$ | 2926                                  | 99           | $\text{FR}_{\text{rx}}$ |
| 2996                                         | 334          | $\text{S}_{\text{BS}}$  | 2972                                  | 533          | $\text{S}_{\text{BS}}$  |
| 3057                                         | 750          | $\text{S}_{\text{BA}}$  | 3027                                  | 406          | $\text{S}_{\text{BA}}$  |
| 3123                                         | 89           | $\text{FR}_{\text{uu}}$ | 3114                                  | 125          | $\text{FR}_{\text{uu}}$ |
| 3196                                         | 24           | $\text{FR}_{\text{ux}}$ | 3164                                  | 13           | $\text{FR}_{\text{ux}}$ |
| 3216                                         | 10           | $\text{FR}_{\text{ux}}$ | 3198                                  | 8            | $\text{FR}_{\text{ux}}$ |
| 3285                                         | 17           | $\text{FR}_{\text{xx}}$ | 3233                                  | 14           | $\text{FR}_{\text{xx}}$ |
| 3308                                         | 5            | $\text{FR}_{\text{xx}}$ | 3269                                  | 2            | $\text{FR}_{\text{xx}}$ |
| 3332                                         | 6            | $\text{FR}_{\text{xx}}$ | 3305                                  | 8            | $\text{FR}_{\text{xx}}$ |
| 3344                                         | 66           | $\text{S}_{\text{F}}$   | 3356                                  | 72           | $\text{S}_{\text{F}}$   |

**Table S2** (continued)

| DMA–H <sup>+</sup> ...(H <sub>2</sub> O) <sub>2</sub> |              |                                    | (DMA–H <sup>+</sup> ) <sub>3</sub> (HSO <sub>4</sub> <sup>–</sup> ) <sub>2</sub> |              |                                    |
|-------------------------------------------------------|--------------|------------------------------------|----------------------------------------------------------------------------------|--------------|------------------------------------|
| wavenumber                                            | IR intensity | assignment                         | wavenumber                                                                       | IR intensity | assignment                         |
| 2512                                                  | 55           | FR <sub>rx</sub>                   | 2493                                                                             | 48           | FR <sub>rx</sub>                   |
| 2543                                                  | 8            | FR <sub>rr</sub>                   | 2521                                                                             | 16           | FR <sub>rr</sub>                   |
| 2580                                                  | 7            | FR <sub>rr</sub>                   | 2590                                                                             | 8            | FR <sub>rr</sub>                   |
| 2900                                                  | 194          | S <sub>B</sub> /FR <sub>rx</sub>   | 2866                                                                             | 166          | FR <sub>rr</sub> /S <sub>B</sub>   |
| 2920                                                  | 114          | FR <sub>rr</sub> /S <sub>B</sub>   | 2881                                                                             | 211          | FR <sub>rr</sub> /S <sub>B</sub>   |
| 2964                                                  | 38           | FR <sub>rr</sub> /FR <sub>rx</sub> | 2943                                                                             | 24           | FR <sub>rr</sub> /FR <sub>rx</sub> |
| 2992                                                  | 73           | FR <sub>rr</sub>                   | 2972                                                                             | 284          | FR <sub>rr</sub>                   |
| 3125                                                  | 95           | FR <sub>rx</sub> /S <sub>B</sub>   | 3085                                                                             | 388          | S <sub>B</sub> /FR <sub>rx</sub>   |
| 3135                                                  | 210          | S <sub>B</sub> /FR <sub>rx</sub>   | 3096                                                                             | 401          | S <sub>B</sub> /FR <sub>rx</sub>   |
| 3145                                                  | 466          | S <sub>B</sub> /FR <sub>rx</sub>   | 3108                                                                             | 22           | FR <sub>rx</sub>                   |
| 3175                                                  | 209          | FR <sub>rx</sub> /S <sub>B</sub>   | 3165                                                                             | 8            | FR <sub>rx</sub>                   |
| 3310                                                  | 12           | FR <sub>xx</sub>                   | 3313                                                                             | 15           | FR <sub>xx</sub>                   |

<sup>a</sup> For the assignments, S<sub>B</sub> and S<sub>F</sub> denote H-bonded and free NH stretching bands, respectively; the additional subscripts S/A indicate symmetric/antisymmetric stretching modes. FR denotes the Fermi resonance band, and the following subscripts indicate the generalized bending overtone and combination tones that are involved: u, umbrella; x, scissoring; r, rocking (wagging/twisting).

**Table S3.** The original frequencies (in  $\text{cm}^{-1}$ ) of NH stretching fundamentals and bending overtones/combination tones, the coupling constants (in  $\text{cm}^{-1}$ ) between them, and the original IR intensities of stretching fundamentals (in  $\text{km mol}^{-1}$ ) that involved in Fermi resonance in the clusters of ammonium/aminium cations solvated by water molecules/bisulfate anions.<sup>a</sup>

| $\text{NH}_4^+\dots(\text{H}_2\text{O})_2$ |      | uu    |      |       |      |      |       | ux   |       |       |      |      |       | xx   |      |      | original |
|--------------------------------------------|------|-------|------|-------|------|------|-------|------|-------|-------|------|------|-------|------|------|------|----------|
|                                            |      | 2850  | 2894 | 2939  | 2943 | 2987 | 3035  | 3134 | 3140  | 3180  | 3184 | 3228 | 3231  | 3421 | 3428 | 3431 | IR int.  |
| S <sub>b,sym</sub>                         | 2882 | 2.0   | 22.6 | -29.5 | 0.0  | 0.0  | 37.0  | 10.2 | 0.4   | -24.2 | -1.0 | 0.3  | -8.6  | -8.0 | 0.4  | -0.3 | 912      |
| S <sub>b,asym</sub>                        | 2884 | 20.8  | 41.5 | -6.8  | 0.0  | 0.1  | -24.7 | 20.2 | 0.8   | 0.6   | 0.1  | 1.1  | -29.7 | 2.0  | 0.8  | -7.9 | 1322     |
| S <sub>f,sym</sub>                         | 3316 | -48.2 | 4.9  | -32.2 | -0.1 | 0.0  | -7.2  | 8.5  | 0.3   | 31.6  | 1.3  | 0.2  | -3.4  | -4.8 | -0.1 | 2.7  | 126      |
| S <sub>f,asym</sub>                        | 3374 | 0.0   | 0.0  | 0.0   | 14.8 | 42.4 | 0.0   | 1.3  | -31.7 | -0.4  | 10.3 | 13.8 | 0.6   | 0.0  | 0.4  | 0.0  | 107      |

  

| $(\text{NH}_4^+)_3(\text{HSO}_4^-)_2$ |      | uu   |       |      |       |      |      | ux    |       |      |      |       |       | xx   |      |      | original |
|---------------------------------------|------|------|-------|------|-------|------|------|-------|-------|------|------|-------|-------|------|------|------|----------|
|                                       |      | 2772 | 2838  | 2897 | 2906  | 2965 | 3024 | 3062  | 3085  | 3130 | 3153 | 3189  | 3211  | 3358 | 3382 | 3402 | IR int.  |
| S <sub>b,sym</sub>                    | 2840 | 1.5  | 44.5  | 3.1  | 16.4  | -5.1 | 25.9 | -11.1 | -11.1 | 7.7  | 11.0 | 10.3  | -17.9 | -1.4 | 0.4  | -4.7 | 942      |
| S <sub>b,asym</sub>                   | 2893 | -8.2 | -36.0 | 1.4  | 15.4  | 2.5  | 35.4 | 10.7  | 9.6   | 11.1 | 12.0 | -9.4  | 14.7  | -3.3 | 1.5  | -5.6 | 813      |
| S <sub>f,sym</sub>                    | 3331 | 55.4 | -1.9  | -0.2 | -33.4 | -1.5 | 7.5  | 0.9   | 2.2   | 23.1 | 19.5 | 0.2   | 0.6   | 7.6  | -1.0 | 4.8  | 150      |
| S <sub>f,asym</sub>                   | 3400 | 1.8  | -1.2  | -3.5 | -2.1  | 58.2 | 1.3  | 35.1  | -38.0 | -0.9 | 3.3  | -18.0 | -14.1 | 0.0  | 0.6  | -0.1 | 86       |



**Table S3 (continued)**

| MA-H <sup>+</sup> ...(H <sub>2</sub> O) <sub>2</sub> |      | rr    |       |      | ru    |       |       |       | rx   |       |       |       |      |       |      | uu    | ux    |       | xx   |      |       | original |         |
|------------------------------------------------------|------|-------|-------|------|-------|-------|-------|-------|------|-------|-------|-------|------|-------|------|-------|-------|-------|------|------|-------|----------|---------|
|                                                      |      | 2632  | 2645  | 2660 | 2556  | 2595  | 2900  | 2915  | 2625 | 2665  | 2973  | 2987  | 2647 | 2690  | 2996 | 3011  | 3161  | 3235  | 3258 | 3312 | 3337  | 3359     | IR int. |
| S <sub>b,sym</sub>                                   | 2989 | -55.8 | 19.3  | 6.0  | 35.9  | -33.0 | 7.7   | -26.2 | -2.6 | 2.2   | -19.3 | 3.4   | 17.1 | -15.1 | -6.9 | -13.7 | 11.3  | 38.3  | 4.2  | -1.6 | -9.4  | 0.3      | 625     |
| S <sub>b,asym</sub>                                  | 2999 | -15.8 | 3.3   | -0.5 | 9.5   | 7.6   | -56.7 | 14.5  | 50.8 | -34.1 | -4.9  | -28.6 | 8.5  | 3.3   | 39.3 | -4.3  | -40.5 | 11.1  | 17.4 | -9.5 | -13.9 | -9.3     | 1186    |
| S <sub>f</sub>                                       | 3318 | 21.0  | -30.7 | 16.3 | -16.7 | -53.8 | -5.9  | -43.0 | 12.9 | -10.9 | -28.3 | -3.6  | 31.8 | -28.2 | 4.6  | -24.5 | -1.4  | -11.5 | 1.1  | -5.9 | 12.5  | -8.9     | 85      |

  

| (MA-H <sup>+</sup> ) <sub>3</sub> (HSO <sub>4</sub> <sup>-</sup> ) <sub>2</sub> |      | rr   |       |       | ru    |       |       |       | rx   |       |       |       |       |      |      | uu    | ux    |       | xx   |       |      | original |         |
|---------------------------------------------------------------------------------|------|------|-------|-------|-------|-------|-------|-------|------|-------|-------|-------|-------|------|------|-------|-------|-------|------|-------|------|----------|---------|
|                                                                                 |      | 2600 | 2600  | 2607  | 2548  | 2584  | 2883  | 2886  | 2593 | 2629  | 2932  | 2936  | 2627  | 2666 | 2968 | 2972  | 3160  | 3210  | 3246 | 3264  | 3302 | 3335     | IR int. |
| S <sub>b,sym</sub>                                                              | 2935 | 7.2  | 11.7  | -20.4 | -28.7 | -45.2 | -41.0 | 8.1   | 23.5 | 22.3  | 23.1  | -11.0 | -22.2 | 21.0 | 12.4 | 25.3  | 25.4  | -9.5  | 5.2  | -0.3  | 6.2  | -18.8    | 848     |
| S <sub>b,asym</sub>                                                             | 3004 | -3.6 | -12.7 | 21.2  | 20.0  | -50.0 | -33.5 | -26.0 | 33.7 | -9.2  | 3.8   | -28.1 | 0.9   | 35.9 | 30.4 | 6.9   | -28.0 | -15.4 | 11.4 | 15.3  | 8.4  | 5.2      | 688     |
| S <sub>f</sub>                                                                  | 3331 | 1.4  | -7.4  | -34.5 | 61.6  | -2.4  | 13.6  | -45.6 | 14.7 | -34.4 | -27.5 | -20.9 | 31.1  | 12.6 | 19.5 | -19.4 | 11.0  | 2.5   | 7.8  | -15.0 | 12.2 | 2.3      | 87      |

  

| DMA-H <sup>+</sup> ...(H <sub>2</sub> O) <sub>2</sub> |      | rr <sub>N</sub> /rt/rw |      |       |      |       |      | tt/tw/ww |      |      |      | rx   |       |      |       |      |      | xx   | original |      |      |      |         |
|-------------------------------------------------------|------|------------------------|------|-------|------|-------|------|----------|------|------|------|------|-------|------|-------|------|------|------|----------|------|------|------|---------|
|                                                       |      | 2471                   | 2509 | 2520  | 2577 | 2597  | 2618 | 2626     | 2646 | 2726 | 2829 | 2940 | 2976  | 3051 | 2544  | 2719 | 2743 | 2841 | 2952     | 3094 | 3195 | 3315 | IR int. |
| S <sub>b,sym</sub>                                    | 2954 | 0.9                    | 6.2  | -9.7  | 14.7 | 9.1   | 0.0  | 43.7     | 0.2  | 0.3  | 0.1  | -0.1 | -13.8 | -0.6 | -58.6 | -1.4 | 4.5  | -1.9 | -36.6    | -2.5 | 10.2 | 18.4 | 968     |
| S <sub>b,asym</sub>                                   | 3281 | -1.3                   | 55.9 | -17.9 | 23.9 | -19.4 | 0.1  | -5.7     | 1.3  | 0.5  | 0.0  | -0.4 | 35.6  | 0.2  | 65.3  | 1.0  | -1.5 | -2.3 | 42.1     | 2.2  | -2.9 | 9.6  | 73      |

  

| (DMA-H <sup>+</sup> ) <sub>3</sub> (HSO <sub>4</sub> <sup>-</sup> ) <sub>2</sub> |      | rr <sub>N</sub> /rt/rw |      |       |      |      |      | tt/tw/ww |      |      |      | rx    |      |       |       |      |      | xx   | original |      |      |       |         |
|----------------------------------------------------------------------------------|------|------------------------|------|-------|------|------|------|----------|------|------|------|-------|------|-------|-------|------|------|------|----------|------|------|-------|---------|
|                                                                                  |      | 2558                   | 2564 | 2567  | 2626 | 2628 | 2663 | 2725     | 2759 | 2774 | 2820 | 2964  | 3028 | 3092  | 2607  | 2762 | 2763 | 2864 | 2964     | 3158 | 3220 | 3357  | IR int. |
| S <sub>b,sym</sub>                                                               | 2980 | -17.5                  | 15.0 | -26.2 | -5.6 | 40.4 | -0.4 | 0.1      | 2.5  | 1.4  | 0.0  | 27.5  | 56.4 | -39.2 | -68.5 | 1.2  | 3.7  | 2.4  | -47.2    | -3.7 | 7.4  | 12.0  | 833     |
| S <sub>b,asym</sub>                                                              | 3008 | 21.5                   | 19.5 | 29.4  | 30.2 | 22.3 | -0.2 | -0.4     | 1.8  | 1.1  | -2.2 | -36.5 | 50.6 | 43.5  | -59.6 | 2.9  | 0.0  | -3.0 | -41.0    | 3.2  | 5.5  | -14.0 | 799     |

<sup>a</sup> Notations to vibrational modes: s<sub>b</sub>, H-bonded NH stretching; s<sub>f</sub>, free NH stretching; u, NH<sub>3</sub> umbrella; x, NH<sub>2</sub> scissoring; r, CH<sub>3</sub>-NH rocking; r<sub>N</sub>, NH<sub>2</sub> rocking; t, NH<sub>2</sub> twisting; w, NH<sub>2</sub> wagging.

**Table S4.** The original frequencies (in  $\text{cm}^{-1}$ ) of the four NH stretching fundamentals of the ammonium ion and the coupling constants (in  $\text{cm}^{-1}$ ) between the NH stretching modes of two ammonium ions in the  $(\text{NH}_4^+)_3(\text{HSO}_4^-)_2$  cluster. Note that only NH stretching modes are included in this tentative calculation.<sup>a</sup>

| NH <sub>4</sub> <sup>+</sup> ion 2 \ NH <sub>4</sub> <sup>+</sup> ion 1 |      | S <sub>b,sym</sub> | S <sub>b,asym</sub> | S <sub>f,sym</sub> | S <sub>f,asym</sub> |
|-------------------------------------------------------------------------|------|--------------------|---------------------|--------------------|---------------------|
|                                                                         |      | 2894               | 2944                | 3377               | 3451                |
| S <sub>b,sym</sub>                                                      | 2894 | -15.9              | 9.2                 | 0.7                | 0.1                 |
| S <sub>b,asym</sub>                                                     | 2944 | -9.2               | 2.4                 | -1.1               | 0.4                 |
| S <sub>f,sym</sub>                                                      | 3377 | -0.7               | -1.1                | -0.6               | 0.1                 |
| S <sub>f,asym</sub>                                                     | 3451 | -0.1               | 0.4                 | 0.1                | 0.0                 |

<sup>a</sup> Notations to vibrational modes: s<sub>b</sub>, H-bonded NH stretching; s<sub>f</sub>, free NH stretching.

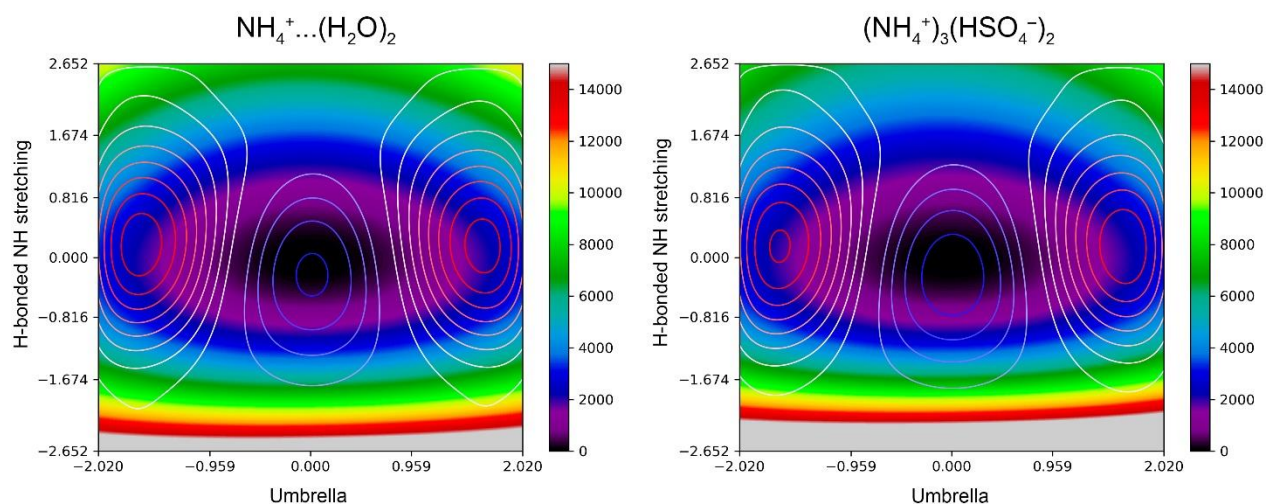

**Figure S1.** An example diagram showing the similarity between the PES and wavefunctions of  $\text{NH}_4^+ \dots (\text{H}_2\text{O})_2$  and  $(\text{NH}_4^+)_3(\text{HSO}_4^-)_2$  clusters. The PES is a low-dimensional cut regarding the H-bonded NH symmetric stretching mode (vertical axis) and one  $\text{NH}_3$  umbrella mode (horizontal axis), and the color map indicates the potential energy. The wavefunction corresponds to the overtone state of the umbrella mode, presenting distortion due to the anharmonic coupling with the stretching mode.
